# Supplementary material
Source: MDPI journal article supplement (https://www.mdpi.com/2079-6412/14/5/580)
Supplement: s1 [file s1]

# Supplementary Materials: Research on the Corrosion Inhibition Behavior and Mechanism of 1-Hydroxy-1,1-ethyldene Disodium Phosphonate under an Iron Bacteria System

Ping Xu \*, Yuxuan Zhao and Pengkai Bai

Key Laboratory of Urban Stormwater System and Water Environment, Ministry of Education, Beijing University of Civil Engineering and Architecture, Beijing 100044, China

\* Correspondence: xuping@bucea.edu.cn

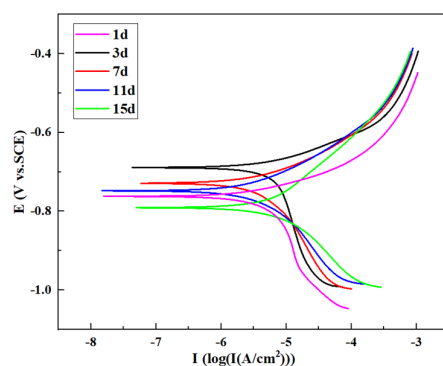

**Figure S1.** Polarization curve in the IB condition.

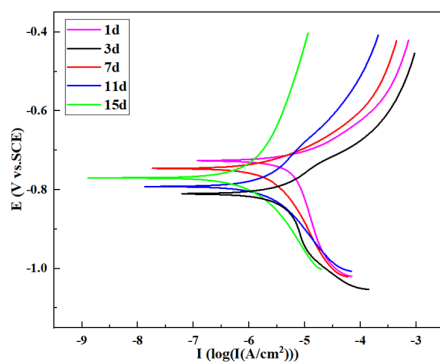

**Figure S2.** Polarization curve in the IB+HEDP condition.

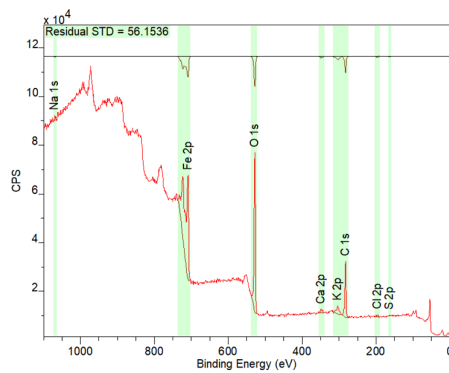

**Figure S3.** The XPS full spectrum analysis of 3d in the IB condition.

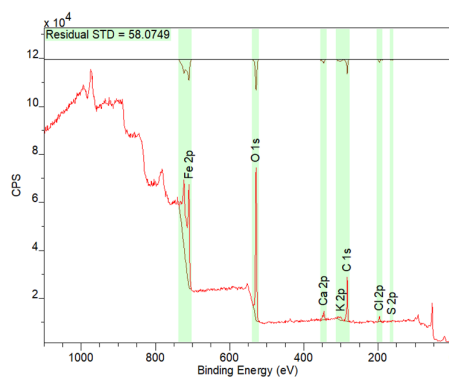

**Figure S4.** The XPS full spectrum analysis of 7d in the IB condition.

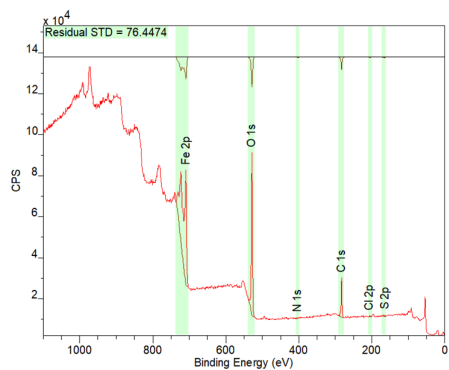

**Figure S5.** The XPS full spectrum analysis of 11d in the IB condition.

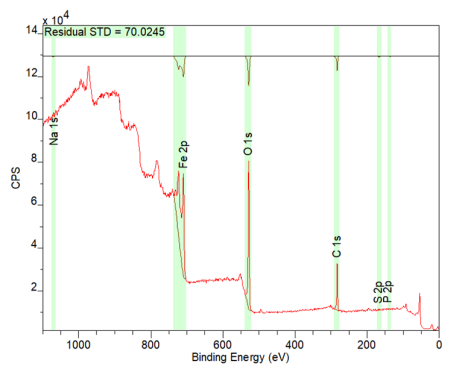

**Figure S6.** The XPS full spectrum analysis of 15d in the IB condition.

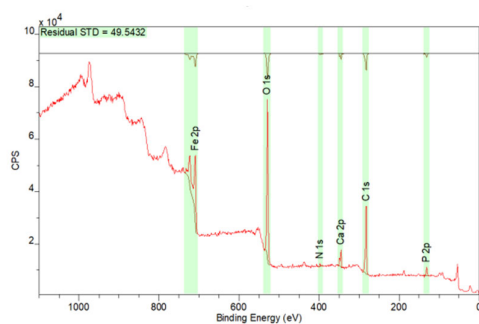

**Figure S7.** The XPS full spectrum analysis of 3d in the IB+HEDP condition.

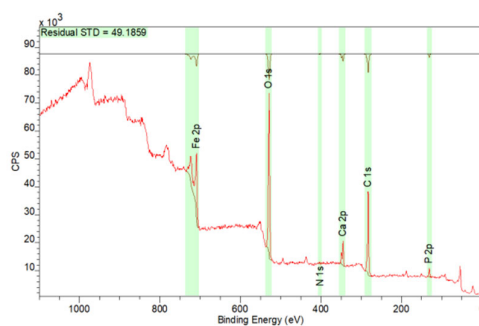

**Figure S8.** The XPS full spectrum analysis of 7d in the IB+HEDP condition.

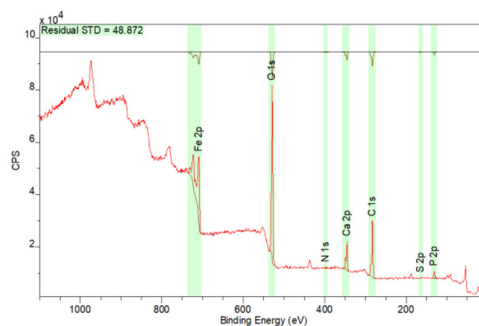

**Figure S9.** The XPS full spectrum analysis of 11d in the IB+HEDP condition.

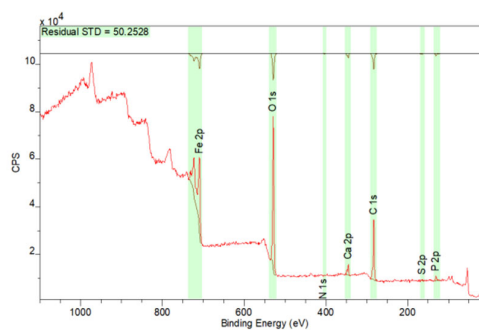

**Figure S10.** The XPS full spectrum analysis of 15d in the IB+HEDP condition.
